# Supplementary material for: Integrated analysis of ultra-deep proteomes in cortex, cerebrospinal fluid and serum reveals a mitochondrial signature in Alzheimer’s disease
Source: Springer Nature journal article supplement (doi:10.1186/s13024-020-00384-6), 2020-07-25
Supplement: MOESM1 [file 18215130]

**Supplementary Figure 1: Majority of top differentially expressed (DE) mitochondrial proteins are tightly correlated with each other in the cerebrospinal fluid (CSF)**

Pairwise Pearson correlation analysis was performed for the top DE mitochondrial proteins.

Heatmap shows the Pearson correlation coefficient (r) values of top DE mitochondrial proteins.



**Supplementary Figure 2: Ultra-deep profiling depth is a prerequisite to detect evident mitochondrial signatures presented in AD CSF proteome**

Volcano plots and corresponding scatter plots of the top 500, 2000, 3000, 4000 most abundant proteins.

For the volcano plots, X-axis shows the Z value of the Z score transformed  $\log_2$  level fold changes comparing AD to Ctl. Y-axis shows the  $-\log_{10}$  level FDR value. Previously reported AD CSF biomarkers are plotted in black and labeled. Top DE mitochondrial proteins with  $FDR < 0.01$  and  $Z \text{ value} < -5$  are plotted in red. For the scatter plots, CSF proteins are plotted as a function of their concentration rank (x-axis) and their mean  $\log_{10}$  level TMT intensity in all samples (y-axis). Previously reported AD CSF biomarkers are plotted in black. Top DE mitochondrial proteins with Z score difference  $> 5$  and  $FDR < 0.01$  were plotted in red.



### Supplementary Figure 3: PPI module proteins are highly correlated with each other

Heatmap shows pairwise correlation analysis of PPI proteins detected in Figure 3E. Pearson correlation coefficient  $r$  values of each pairwise correlation analysis in the cortex are displayed. The color of each module matches the PPI module edge colors in Figure 3E.

### ALDH6A1



### ETFB



### SOD2



### PRDX3



**Supplementary Figure 4: Mitochondrial proteins that have decreased expression levels in AD in all three analyzed biofluids**

Dot plots overlaid onto boxplots showing expression of proteins in human cortex, human CSF, mouse CSF and serum. X-axis shows sample groups, y-axis indicates  $\text{Log}_2$  transformed TMT intensity. Boxplot center line, median; box limits, upper and lower quartiles; whiskers, 1.5x interquartile range; points, expression levels of each individual samples.
